# Supplementary material for: Development of a cognitive bias methodology for measuring low mood in chimpanzees
Source: PubMed Central journal article supplement (PMC4465942; doi:10.7717/peerj.998), 2015-06-11
Supplement: peerj-03-998-s001.pdf [file peerj-03-998-s001.pdf]

Bateson & Nettle

**READ ME file for Chimp\_data\_MS.csv**

The accompanying .csv file contains the following variables:

**Date:** the date on which the data was collected

**Time:** the time of day the data was collected: am (A) or pm (P)

**Chimp:** the name of the chimpanzee (Bobby, ET or Nicky)

**Session:** the session number (integer: 1-n)

**Phase:** the phase of training/testing. Six-trial blocks (BT), three-trial blocks (H), choice trials (C) or test (T)

**Trial:** the trial number (integer: 1-n)

**Valence:** the valence of the cone presented (in forced trials) or chosen (in choice trials). Positive (P), near positive (NP), mid (M), near negative (NP) or negative (N).

**Side:** the side on which the cone was presented (in forced trials) or of the cone chosen (in choice trials). Right (R) or left (L).

**Latency:** the latency in seconds to touch the cone (forced trials) or the first cone (choice trials).

**Carrot:** Whether or not a piece of carrot was presented, and if so whether the chimp touched it before the cone (1), after the cone (2) or not at all within 60 s (0).
